# Supplementary material for: Risk of stroke and transient ischaemic attack in patients with a diagnosis of resolved atrial fibrillation: retrospective cohort studies
Source: PubMed Central journal article supplement (PMC5942157; doi:10.1136/bmj.k1717), 2018-05-09
Supplement: addn041773.wf1.pdf [file addn041773.wf1.pdf]

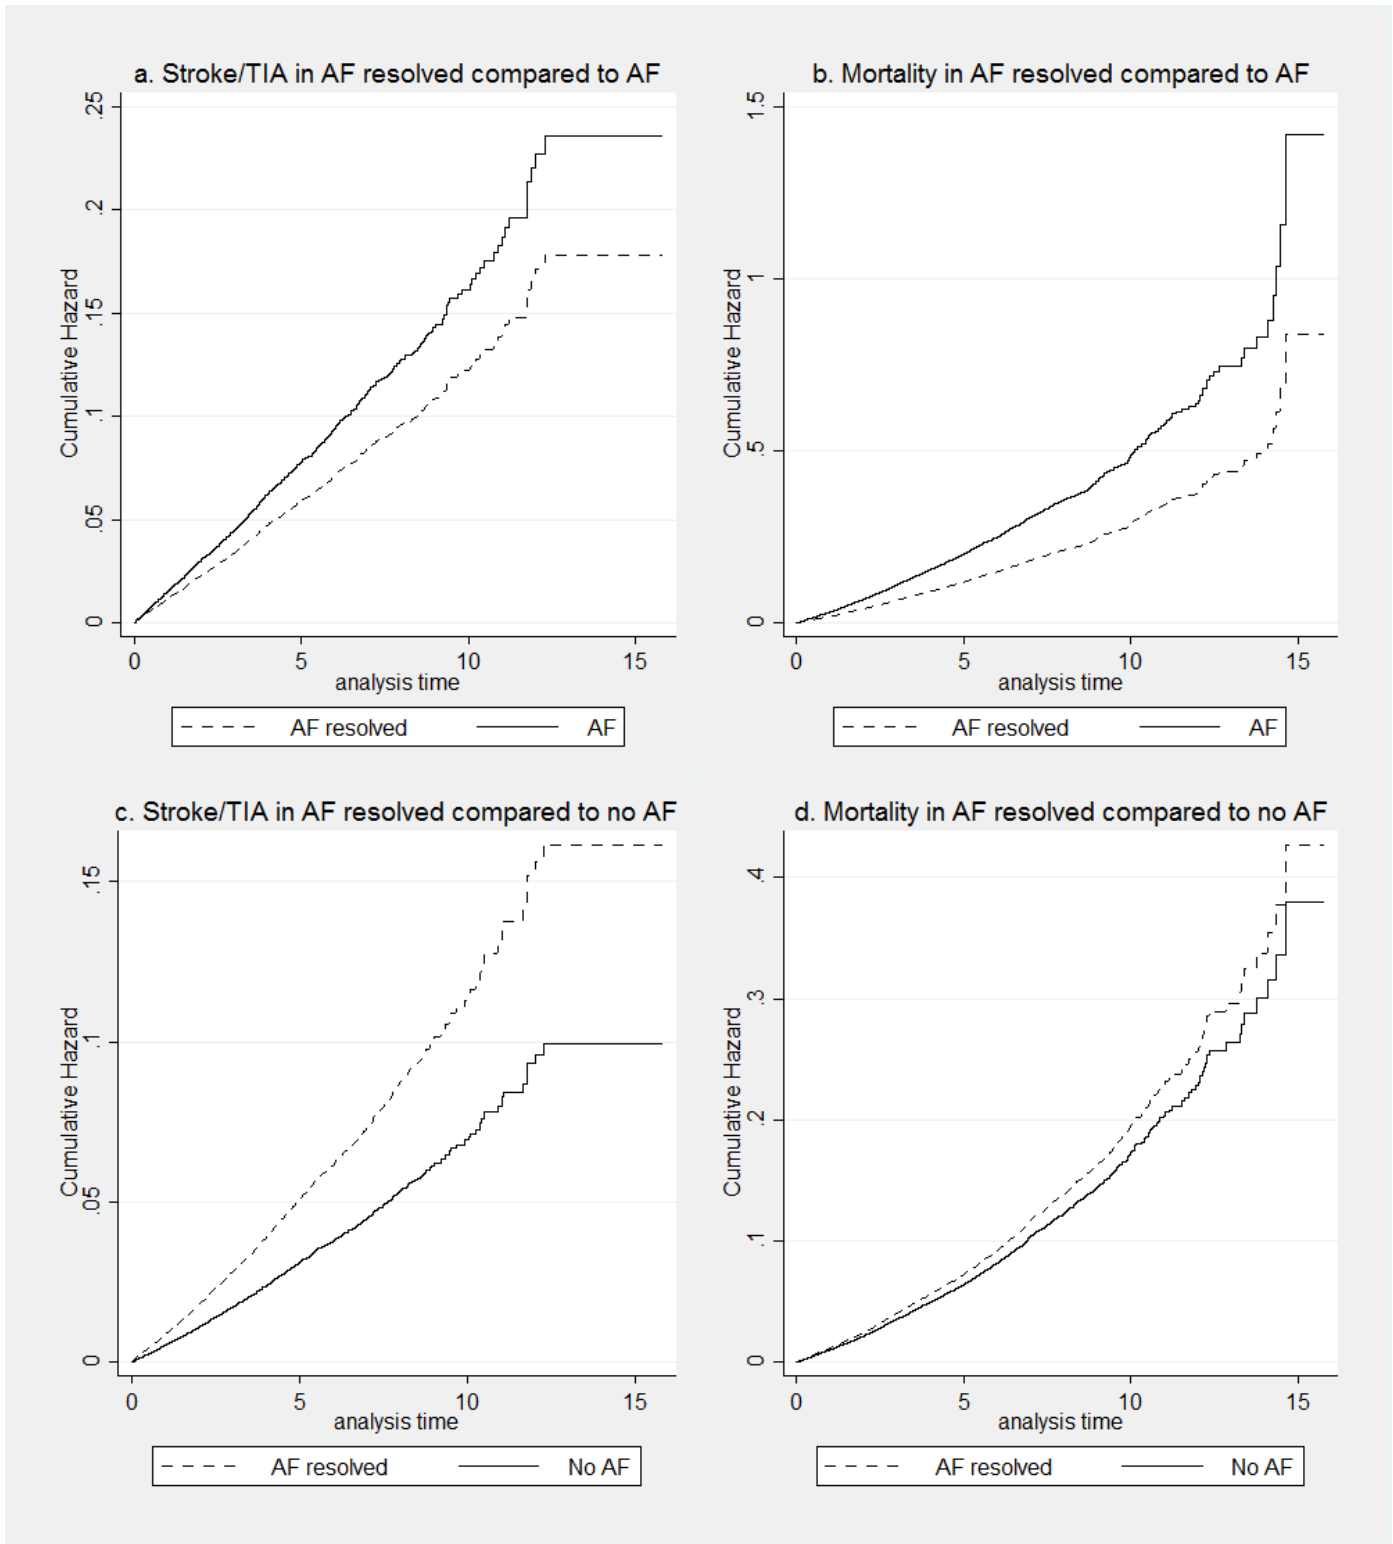

**Supplementary Figure 1. Adjusted cumulative hazard estimates for a. stroke/TIA and b. mortality in patients with resolved compared to unresolved AF, and c. stroke/TIA and d. mortality in patients with resolved AF compared to patients without AF.**
